# Supplementary material for: Tracing winter temperatures over the last two millennia using a north-east Atlantic coastal record
Source: Copernicus journal article supplement (doi:10.5194/cp-14-1097-2018), 2018-07-25

Supplement of *Clim. Past*, 14, 1097–1118, 2018  
<https://doi.org/10.5194/cp-14-1097-2018-supplement>  
© Author(s) 2018. This work is distributed under  
the Creative Commons Attribution 4.0 License.

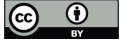

*Supplement of*

## **Tracing winter temperatures over the last two millennia using a north-east Atlantic coastal record**

**Irina Polovodova Asteman et al.**

*Correspondence to:* Kjell Nordberg ([kjell.nordberg@marine.gu.se](mailto:kjell.nordberg@marine.gu.se))

The copyright of individual parts of the supplement might differ from the CC BY 4.0 License.

Supplementary Fig. 1

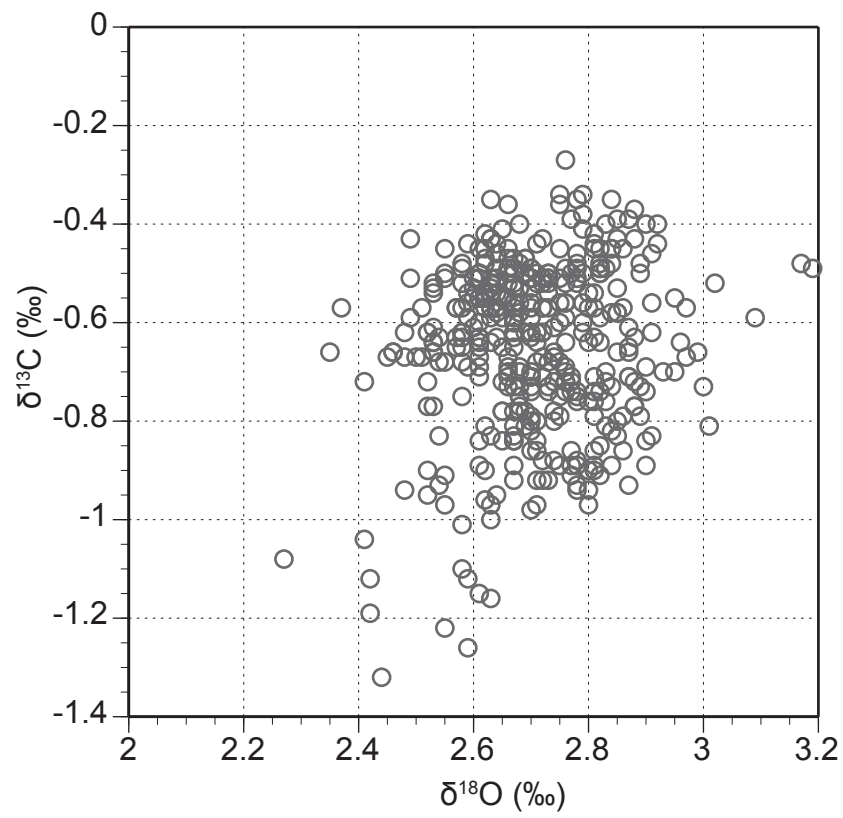

Supplement: Supplementary file 1 [file cp-14-1097-2018-supplement.pdf]
